# Supplementary material
Source: MDPI journal article supplement (https://www.mdpi.com/1424-2818/13/6/273)
Supplement: s1 [file s1]

**Table S1.** Metadata and genes sequenced of the samples used in this study.

| Species                  | Sample Name         | Source <sup>a</sup> | Sample Number <sup>b</sup> | Country of Origin | Sample Type | Regions Sequenced                     |
|--------------------------|---------------------|---------------------|----------------------------|-------------------|-------------|---------------------------------------|
| <i>A. f. farinosa</i>    | farin1              | KU                  | 1471                       | Guyana            | Tissue      | 12S, 16S, COI, CytB, TROP, ND2        |
| <i>A. f. farinosa</i>    | farin2              | KU                  | 1474                       | Guyana            | Tissue      | 12S, 16S, COI, CytB, TGFB2, TROP, ND2 |
| <i>A. f. farinosa</i>    | farin3              | KU                  | 1475                       | Guyana            | Tissue      | 12S, 16S, COI, CytB, TGFB2, TROP, ND2 |
| <i>A. f. farinosa</i>    | farin4              | USNM                | B04253                     | Guyana            | Tissue      | 12S, 16S, COI, CytB, TGFB2, TROP, ND2 |
| <i>A. f. farinosa</i>    | farin5              | USNM                | B09182                     | Guyana            | Tissue      | 12S, 16S, COI, CytB, TGFB2, TROP, ND2 |
| <i>A. f. farinosa</i>    | farin6              | ANSP                | 19984                      | Ecuador           | Tissue      | 12S, 16S, COI, CytB, TROP, ND2        |
| <i>A. f. farinosa</i>    | farin7              | LSUMNS              | B-10625                    | Peru              | Tissue      | 12S, 16S, COI, CytB, TGFB2, TROP, ND2 |
| <i>A. f. farinosa</i>    | farin8              | USNM                | B9176                      | Guyana            | Tissue      | 12S, 16S, COI, CytB, TGFB2, TROP, ND2 |
| <i>A. f. farinosa</i>    | farin9 <sup>c</sup> | MR                  | HV16                       | Captive           | Tissue      | 12S, 16S, COI                         |
| <i>A. f. farinosa</i>    | farin10             | USNM                | 345855                     | Brazil            | Bone        | COI, CytB                             |
| <i>A. f. farinosa</i>    | amfar17             | ASMC                | 4223-17                    | Brazil            | Blood       | 12S, 16S, TROP, CytB, ND2             |
| <i>A. f. farinosa</i>    | amfar18             | ASMC                | 4223-18                    | Brazil            | Blood       | 12S, 16S, TROP, CytB, ND2             |
| <i>A. f. farinosa</i>    | amfar19             | ASMC                | 4223-19                    | Brazil            | Blood       | 12S, 16S, TROP, TGFB2, CytB, ND2      |
| <i>A. f. farinosa</i>    | amfar20             | ASMC                | 4223-20                    | Brazil            | Blood       | 12S, 16S, TROP, CytB, ND2             |
| <i>A. f. farinosa</i>    | amfar21             | ASMC                | 4223-21                    | Brazil            | Blood       | 12S, 16S, TROP, TGFB2, CytB, ND2      |
| <i>A. f. farinosa</i>    | amfar22             | ASMC                | 4223-22                    | Brazil            | Blood       | 12S, 16S, TROP, CytB, ND2             |
| <i>A. f. farinosa</i>    | amfar23             | ASMC                | 4223-23                    | Brazil            | Blood       | 12S, 16S, TROP, TGRB2, CytB, ND2      |
| <i>A. f. chapmani</i>    | chapm1              | LSUMNS              | B-39761                    | Peru              | Tissue      | 12S, COI, CytB, TGFB2, ND2            |
| <i>A. f. chapmani</i>    | chapm2 <sup>c</sup> | MR                  | HV17                       | Captive           | Tissue      | 12S, 16S, COI                         |
| <i>A. f. inornata</i>    | inorn1              | LSUMNS              | B-2202                     | Panama            | Tissue      | 12S, 16S, COI, CytB, TGFB2, TROP, ND2 |
| <i>A. f. inornata</i>    | inorn2 <sup>c</sup> | MR                  | 893                        | Captive           | Tissue      | 12S, 16S, COI                         |
| <i>A. f. inornata</i>    | inorn3              | ROM                 | 40930                      | Ecuador           | Toe Pad     | COI, CytB                             |
| <i>A. f. inornata</i>    | inorn4              | ROM                 | 73265                      | Colombia          | Toe Pad     | COI, CytB                             |
| <i>A. f. guatemalae</i>  | guate1              | KU                  | 1472                       | Honduras          | Tissue      | 12S, 16S, COI, CytB, TGFB2, TROP, ND2 |
| <i>A. f. guatemalae</i>  | guate2              | KU                  | 1473                       | Honduras          | Tissue      | 12S, 16S, COI, CytB, TGFB2, TROP, ND2 |
| <i>A. f. guatemalae</i>  | guate3 <sup>c</sup> | MR                  | HV19                       | Captive           | Tissue      | 12S, 16S, COI                         |
| <i>A. f. virenticeps</i> | viren1 <sup>c</sup> | MR                  | HV20                       | Captive           | Tissue      | 12S, 16S, COI                         |
| <i>A. f. virenticeps</i> | viren2              | USNM                | 209795                     | Costa Rica        | Toe Pad     | COI, CytB                             |
| <i>A. f. virenticeps</i> | viren3              | USNM                | 209796                     | Costa Rica        | Toe Pad     | COI, CytB                             |
| <i>A. f. virenticeps</i> | viren4              | USNM                | 410166                     | Costa Rica        | Toe Pad     | COI, CytB                             |
| <i>A. kawalli</i>        | kawal1              | FMNH                | 45642                      | Brazil            | Tissue      | 12S, 16S, COI, CytB, TGFB2, TROP, ND2 |
| <i>A. kawalli</i>        | kawal2              | FMNH                | 45643                      | Brazil            | Tissue      | 12S, 16S, COI, CytB, TGFB2, TROP, ND2 |
| <i>A. kawalli</i>        | kawal3 <sup>c</sup> | MR                  | 849                        | Brazil            | Tissue      | 12S, COI                              |
| <i>A. kawalli</i>        | kawal4 <sup>c</sup> | MR                  | 868                        | Brazil            | Tissue      | 12S, 16S, COI                         |
| <i>A. auropalliata</i>   | auropalliata        | TW field            | 93-39                      | Costa Rica        | Tissue      | 12S, 16S, COI, CytB, TGFB2, TROP, ND2 |
| <i>A. amazonica</i>      | amazonica           | USNM                | B12700                     | Guyana            | Tissue      | 12S, 16S, COI, CytB, TGFB2, TROP, ND2 |

<sup>a</sup> Source abbreviations are as follows: ANSP (Academy of Natural Sciences of Philadelphia), ASMC (ASM Cambaquara Rescue Center), FMNH (Field Museum of Natural History), KU (University of Kansas Natural History Museum), LSUMNS (Louisiana State University Museum of Natural Science), USNM (Smithsonian National Museum of Natural History), ROM (Royal Ontario Museum), TW field (Wright lab), and MR (Russello & Amato 2004)

<sup>b</sup> Specimen numbers correspond to accession numbers assigned to each sample or specimen by the respective museum or collection

<sup>c</sup> These samples were previously sequenced by Russello & Amato (2004)

---

**Table S2.** Metadata for the sound files used in this study.

| Recording ID | Database         | Scientific Name    | Clade           | Year | Country  | State/District/Province | Latitude   | Longitude  |
|--------------|------------------|--------------------|-----------------|------|----------|-------------------------|------------|------------|
| 32258        | Macaulay Library | <i>A. farinosa</i> | atlantic forest | 1982 | Brazil   | Espirito Santo          | -19.009351 | -40.114021 |
| 52065        | Macaulay Library | <i>A. farinosa</i> | atlantic forest | 1989 | Brazil   | Espirito Santo          | -19.009351 | -40.114021 |
| 113339       | Macaulay Library | <i>A. farinosa</i> | atlantic forest | 1999 | Brazil   | Espirito Santo          | -19.0556   | -40.1467   |
| 113353       | Macaulay Library | <i>A. farinosa</i> | atlantic forest | 1999 | Brazil   | Espirito Santo          | -19.0556   | -40.1467   |
| 189434       | Macaulay Library | <i>A. farinosa</i> | atlantic forest | 2012 | Brazil   | Rio de Janeiro          | -23.1788   | -44.2045   |
| 171588       | Xeno-canto       | <i>A. farinosa</i> | atlantic forest | 2013 | Brazil   | Minas Gerais            | -19.792    | -42.607    |
| 292878       | Xeno-canto       | <i>A. farinosa</i> | atlantic forest | 1998 | Brazil   | Espirito Santo          | -19.027    | -40.156    |
| 84847        | Xeno-canto       | <i>A. farinosa</i> | atlantic forest | 2004 | Brazil   | Espirito Santo          | -19.1456   | -40.0645   |
| 84846        | Xeno-canto       | <i>A. farinosa</i> | atlantic forest | 2004 | Brazil   | Espirito Santo          | -19.1456   | -40.0645   |
| 2856         | Xeno-canto       | <i>A. farinosa</i> | chapmani        | 1995 | Bolivia  | La Paz                  | -15.1      | -67.533    |
| 63112        | Xeno-canto       | <i>A. farinosa</i> | chapmani        | 2001 | Bolivia  | La Paz                  | -14.189521 | -68.331932 |
| 38870        | Macaulay Library | <i>A. farinosa</i> | chapmani        | 1986 | Bolivia  | Pando                   | -11.08     | -68.89     |
| 52351        | Macaulay Library | <i>A. farinosa</i> | chapmani        | 1990 | Bolivia  | La Paz                  | -13.6667   | -69        |
| 87835        | Macaulay Library | <i>A. farinosa</i> | chapmani        | 1995 | Bolivia  | La Paz                  | -15.0333   | -67.2333   |
| 101880       | Macaulay Library | <i>A. farinosa</i> | chapmani        | 1999 | Bolivia  | La Paz                  | -15.2586   | -67.1378   |
| 90896        | Macaulay Library | <i>A. farinosa</i> | chapmani        | 1993 | Bolivia  | El Beni                 | -14.82     | -66.85     |
| 123339       | Xeno-canto       | <i>A. farinosa</i> | chapmani        | 2011 | Peru     | Madre de Dios           | -12.4775   | -69.0881   |
| 123325       | Xeno-canto       | <i>A. farinosa</i> | chapmani        | 2011 | Peru     | Madre de Dios           | -12.4775   | -69.0881   |
| 11477        | Macaulay Library | <i>A. farinosa</i> | chapmani        | 1977 | Peru     | Madre de Dios           | -12.5      | -69        |
| 12843        | Macaulay Library | <i>A. farinosa</i> | chapmani        | 1977 | Peru     | Madre de Dios           | -12.5      | -69        |
| 12864        | Macaulay Library | <i>A. farinosa</i> | chapmani        | 1977 | Peru     | Madre de Dios           | -12.5      | -69        |
| 17602        | Macaulay Library | <i>A. farinosa</i> | chapmani        | 1974 | Peru     | Cusco                   | -12.98     | -72.65     |
| 17609        | Macaulay Library | <i>A. farinosa</i> | chapmani        | 1974 | Peru     | Madre de Dios           | -12.88     | -69.28     |
| 18184        | Macaulay Library | <i>A. farinosa</i> | chapmani        | 1979 | Peru     | Madre de Dios           | -12.8333   | -69.25     |
| 24231        | Macaulay Library | <i>A. farinosa</i> | chapmani        | 1981 | Peru     | Madre de Dios           | -12.88     | -69.28     |
| 39015        | Macaulay Library | <i>A. farinosa</i> | chapmani        | 1986 | Peru     | Madre de Dios           | -12.88     | -69.28     |
| 147326       | Macaulay Library | <i>A. farinosa</i> | chapmani        | 2009 | Peru     | Cusco                   | -12.5758   | -73.0878   |
| 227732       | Macaulay Library | <i>A. farinosa</i> | chapmani        | 2000 | Peru     | Madre de Dios           | -12.439742 | -70.601234 |
| 85167141     | Macaulay Library | <i>A. farinosa</i> | chapmani        | 2011 | Peru     | Madre de Dios           | -12.4771   | -69.089    |
| 85168301     | Macaulay Library | <i>A. farinosa</i> | chapmani        | 2011 | Peru     | Madre de Dios           | -12.4771   | -69.089    |
| 126249041    | Macaulay Library | <i>A. farinosa</i> | chapmani        | 2018 | Peru     | Madre de Dios           | -11.8884   | -71.408    |
| 373507       | Xeno-canto       | <i>A. farinosa</i> | farinosa        | 2015 | Brazil   | Acre                    | -10.1325   | -67.7507   |
| 479427       | Xeno-canto       | <i>A. farinosa</i> | farinosa        | 2008 | Brazil   | Acre                    | -9.642     | -70.037    |
| 583036       | Xeno-canto       | <i>A. farinosa</i> | farinosa        | 2020 | Brazil   | Amazonas                | -4.067     | -60.6598   |
| 31510        | Macaulay Library | <i>A. farinosa</i> | farinosa        | 1984 | Brazil   | Amazonas                | -2.45      | -59.7333   |
| 88961        | Macaulay Library | <i>A. farinosa</i> | farinosa        | 1997 | Brazil   | Mato Grosso             | -9.878013  | -56.097235 |
| 115064       | Macaulay Library | <i>A. farinosa</i> | farinosa        | 1999 | Brazil   | Para                    | -3.0436    | -54.9281   |
| 190882841    | Macaulay Library | <i>A. farinosa</i> | farinosa        | 2019 | Brazil   | Amazonas                | -2.0129    | -59.9132   |
| 525109       | Xeno-canto       | <i>A. farinosa</i> | farinosa        | 2001 | Colombia | Caqueta                 | 0.2175     | -72.423056 |

|           |                  |                    |          |      |               |                 |           |            |
|-----------|------------------|--------------------|----------|------|---------------|-----------------|-----------|------------|
| 525108    | Xeno-canto       | <i>A. farinosa</i> | farinosa | 2001 | Colombia      | Caqueta         | 0.2175    | -72.423056 |
| 525055    | Xeno-canto       | <i>A. farinosa</i> | farinosa | 2001 | Colombia      | Caqueta         | 0.2175    | -72.423056 |
| 81822     | Xeno-canto       | <i>A. farinosa</i> | farinosa | 2011 | Colombia      | Vaupes          | 1.2598    | -70.2367   |
| 520744    | Xeno-canto       | <i>A. farinosa</i> | farinosa | 2000 | Colombia      | Caqueta         | 0.5291667 | -72.630556 |
| 520743    | Xeno-canto       | <i>A. farinosa</i> | farinosa | 2000 | Colombia      | Caqueta         | 0.5291667 | -72.630556 |
| 520740    | Xeno-canto       | <i>A. farinosa</i> | farinosa | 2000 | Colombia      | Caqueta         | 0.5344444 | -72.6325   |
| 520735    | Xeno-canto       | <i>A. farinosa</i> | farinosa | 2000 | Colombia      | Caqueta         | 0.4986111 | -72.619444 |
| 520734    | Xeno-canto       | <i>A. farinosa</i> | farinosa | 2000 | Colombia      | Caqueta         | 0.2605556 | -72.923333 |
| 519176    | Xeno-canto       | <i>A. farinosa</i> | farinosa | 2000 | Colombia      | Caqueta         | 0.1797222 | -72.623333 |
| 517840    | Xeno-canto       | <i>A. farinosa</i> | farinosa | 2000 | Colombia      | Caqueta         | 0.24      | -72.933889 |
| 163579    | Xeno-canto       | <i>A. farinosa</i> | farinosa | 1987 | Colombia      | Amazonas        | -3.8717   | -70.15     |
| 251991    | Macaulay Library | <i>A. farinosa</i> | farinosa | 2000 | Colombia      | Caqueta         | 0.1572    | -72.6292   |
| 252219    | Macaulay Library | <i>A. farinosa</i> | farinosa | 2000 | Colombia      | Caqueta         | 0.1797    | -72.6233   |
| 252671    | Macaulay Library | <i>A. farinosa</i> | farinosa | 2000 | Colombia      | Caqueta         | 0.4986    | -72.6194   |
| 252986    | Macaulay Library | <i>A. farinosa</i> | farinosa | 2000 | Colombia      | Caqueta         | 0.5344    | -72.6325   |
| 252987    | Macaulay Library | <i>A. farinosa</i> | farinosa | 2000 | Colombia      | Caqueta         | 0.5344    | -72.6325   |
| 253063    | Macaulay Library | <i>A. farinosa</i> | farinosa | 2000 | Colombia      | Caqueta         | 0.5344    | -72.6325   |
| 253107    | Macaulay Library | <i>A. farinosa</i> | farinosa | 2000 | Colombia      | Caqueta         | 0.5292    | -72.6306   |
| 253591    | Macaulay Library | <i>A. farinosa</i> | farinosa | 2000 | Colombia      | Caqueta         | 0.2606    | -72.9233   |
| 255378    | Macaulay Library | <i>A. farinosa</i> | farinosa | 2001 | Colombia      | Caqueta         | 0.2175    | -72.4231   |
| 255843    | Macaulay Library | <i>A. farinosa</i> | farinosa | 2001 | Colombia      | Caqueta         | 0.2094    | -72.4153   |
| 269007    | Macaulay Library | <i>A. farinosa</i> | farinosa | 2007 | Colombia      | Vichada         | 4.5322    | -68.0911   |
| 270699    | Macaulay Library | <i>A. farinosa</i> | farinosa | 2007 | Colombia      | Vichada         | 4.5364    | -67.9089   |
| 270851    | Macaulay Library | <i>A. farinosa</i> | farinosa | 2007 | Colombia      | Vichada         | 4.5364    | -67.9089   |
| 270868    | Macaulay Library | <i>A. farinosa</i> | farinosa | 2007 | Colombia      | Vichada         | 4.5078    | -68.0589   |
| 65238     | Xeno-canto       | <i>A. farinosa</i> | farinosa | 2010 | French Guiana | Regina          | 4.31667   | -52.1333   |
| 527653    | Xeno-canto       | <i>A. farinosa</i> | farinosa | 2020 | Guyana        | Potaro-Siparuni | 4.5032    | -58.775    |
| 25584     | Macaulay Library | <i>A. farinosa</i> | farinosa | 1981 | Suriname      | Sipaliwini      | 4.683865  | -56.180368 |
| 31046     | Macaulay Library | <i>A. farinosa</i> | farinosa | 1982 | Suriname      | Sipaliwini      | 4.683865  | -56.180368 |
| 134601    | Macaulay Library | <i>A. farinosa</i> | farinosa | 2006 | Suriname      | Sipaliwini      | 4.276095  | -56.747297 |
| 166780    | Xeno-canto       | <i>A. farinosa</i> | farinosa | 2006 | Venezuela     | Bolivar         | 6.9001    | -61.2501   |
| 7078      | Xeno-canto       | <i>A. farinosa</i> | farinosa | 1984 | Venezuela     | Bolivar         | 8.1101    | -61.6714   |
| 34475     | Macaulay Library | <i>A. farinosa</i> | farinosa | 1985 | Venezuela     | Bolivar         | 7.97      | -61.88     |
| 45539     | Macaulay Library | <i>A. farinosa</i> | farinosa | 1987 | Venezuela     | Bolivar         | 7.97      | -61.88     |
| 49309     | Macaulay Library | <i>A. farinosa</i> | farinosa | 1989 | Venezuela     | Bolivar         | 8.1667    | -61.75     |
| 68660     | Macaulay Library | <i>A. farinosa</i> | farinosa | 1965 | Venezuela     | Bolivar         | 7.9667    | -61.8833   |
| 68661     | Macaulay Library | <i>A. farinosa</i> | farinosa | 1966 | Venezuela     | Bolivar         | 7.9667    | -61.8833   |
| 68662     | Macaulay Library | <i>A. farinosa</i> | farinosa | 1966 | Venezuela     | Bolivar         | 7.9667    | -61.8833   |
| 68670     | Macaulay Library | <i>A. farinosa</i> | farinosa | 1967 | Venezuela     | Bolivar         | 7.9667    | -61.8833   |
| 68672     | Macaulay Library | <i>A. farinosa</i> | farinosa | 1968 | Venezuela     | Bolivar         | 7.6333    | -64.8833   |
| 68673     | Macaulay Library | <i>A. farinosa</i> | farinosa | 1968 | Venezuela     | Bolivar         | 7.9667    | -61.8833   |
| 169462401 | Macaulay Library | <i>A. farinosa</i> | farinosa | 2006 | Venezuela     | Bolivar         | 6.9244    | -61.2838   |
| 169465401 | Macaulay Library | <i>A. farinosa</i> | farinosa | 2006 | Venezuela     | Bolivar         | 6.9244    | -61.2838   |

|           |                  |                      |            |      |           |             |           |            |
|-----------|------------------|----------------------|------------|------|-----------|-------------|-----------|------------|
| 169671031 | Macaulay Library | <i>A. farinosa</i>   | farinosa   | 2006 | Venezuela | Bolivar     | 6.9244    | -61.2838   |
| 170154121 | Macaulay Library | <i>A. farinosa</i>   | farinosa   | 2007 | Venezuela | Bolivar     | 7.2514    | -64.8611   |
| 170161761 | Macaulay Library | <i>A. farinosa</i>   | farinosa   | 2007 | Venezuela | Bolivar     | 7.2514    | -64.8611   |
| 522866    | Xeno-canto       | <i>A. guatemalae</i> | guatemalae | 2019 | Belize    | Orange Walk | 17.539    | -89.1111   |
| 45803     | Macaulay Library | <i>A. guatemalae</i> | guatemalae | 1983 | Belize    | Belize      | 17.491254 | -88.537433 |
| 70800     | Macaulay Library | <i>A. guatemalae</i> | guatemalae | 1992 | Belize    | Toledo      | 16.359269 | -89.059283 |
| 70801     | Macaulay Library | <i>A. guatemalae</i> | guatemalae | 1992 | Belize    | Toledo      | 16.359269 | -89.059283 |
| 70818     | Macaulay Library | <i>A. guatemalae</i> | guatemalae | 1992 | Belize    | Toledo      | 16.359269 | -89.059283 |
| 70873     | Macaulay Library | <i>A. guatemalae</i> | guatemalae | 1992 | Belize    | Toledo      | 16.359269 | -89.059283 |
| 71093     | Macaulay Library | <i>A. guatemalae</i> | guatemalae | 1992 | Belize    | Toledo      | 16.359269 | -89.059283 |
| 71094     | Macaulay Library | <i>A. guatemalae</i> | guatemalae | 1992 | Belize    | Toledo      | 16.359269 | -89.059283 |
| 146310731 | Macaulay Library | <i>A. guatemalae</i> | guatemalae | 2019 | Belize    | Cayo        | 16.7513   | -89.009    |
| 212534271 | Macaulay Library | <i>A. guatemalae</i> | guatemalae | 2020 | Belize    | Cayo        | 17.0988   | -88.9656   |
| 125985    | Xeno-canto       | <i>A. guatemalae</i> | guatemalae | 2013 | Guatemala | Peten       | 17.2226   | -89.6237   |
| 125983    | Xeno-canto       | <i>A. guatemalae</i> | guatemalae | 2013 | Guatemala | Peten       | 17.2226   | -89.6237   |
| 137679    | Macaulay Library | <i>A. guatemalae</i> | guatemalae | 2009 | Guatemala | Peten       | 17.2239   | -89.6299   |
| 139413    | Macaulay Library | <i>A. guatemalae</i> | guatemalae | 2009 | Guatemala | Peten       | 17.2237   | -89.6298   |
| 218370    | Xeno-canto       | <i>A. guatemalae</i> | guatemalae | 2003 | Mexico    | Chiapas     | 16.7      | -91.083333 |
| 8421      | Macaulay Library | <i>A. guatemalae</i> | guatemalae | 1954 | Mexico    | Veracruz    | 17.866667 | -94.083333 |
| 83881001  | Macaulay Library | <i>A. guatemalae</i> | guatemalae | 2017 | Mexico    | Chiapas     | 16.7613   | -91.1028   |
| 449261    | Xeno-canto       | <i>A. farinosa</i>   | inornata   | 2018 | Colombia  | Putumayo    | 0.6513    | -77.0739   |
| 260390    | Macaulay Library | <i>A. farinosa</i>   | inornata   | 1990 | Colombia  | Choco       | 7.8       | -77.15     |
| 101175591 | Macaulay Library | <i>A. farinosa</i>   | inornata   | 2013 | Colombia  | Antioquia   | 7.7747    | -76.6685   |
| 257702    | Xeno-canto       | <i>A. farinosa</i>   | inornata   | 2001 | Ecuador   | Sucumbios   | -0.498    | -76.373    |
| 71113     | Xeno-canto       | <i>A. farinosa</i>   | inornata   | 1997 | Ecuador   | Pichincha   | 0.258     | -79.192    |
| 48956     | Macaulay Library | <i>A. farinosa</i>   | inornata   | 1987 | Ecuador   | Esmeraldas  | 0.8667    | -78.55     |
| 51329     | Macaulay Library | <i>A. farinosa</i>   | inornata   | 1991 | Ecuador   | Napo        | -0.45     | -76.28     |
| 51354     | Macaulay Library | <i>A. farinosa</i>   | inornata   | 1991 | Ecuador   | Napo        | -0.45     | -76.28     |
| 53405     | Macaulay Library | <i>A. farinosa</i>   | inornata   | 1991 | Ecuador   | Napo        | -5.0833   | -76.4      |
| 63143     | Macaulay Library | <i>A. farinosa</i>   | inornata   | 1990 | Ecuador   | Esmeraldas  | 0.95      | -78.55     |
| 80212     | Macaulay Library | <i>A. farinosa</i>   | inornata   | 1991 | Ecuador   | Esmeraldas  | 0.6167    | -79.85     |
| 80224     | Macaulay Library | <i>A. farinosa</i>   | inornata   | 1991 | Ecuador   | Esmeraldas  | 0.6167    | -79.85     |
| 82439     | Macaulay Library | <i>A. farinosa</i>   | inornata   | 1991 | Ecuador   | Esmeraldas  | 0.6167    | -79.85     |
| 246368    | Macaulay Library | <i>A. farinosa</i>   | inornata   | 2004 | Ecuador   | Esmeraldas  | 0.617     | -79.233    |
| 454408    | Xeno-canto       | <i>A. farinosa</i>   | inornata   | 2019 | Panama    | Colon       | 9.0334    | -80.1334   |
| 361416    | Xeno-canto       | <i>A. farinosa</i>   | inornata   | 2017 | Panama    | Colon       | 9.1186    | -79.6954   |
| 271059    | Xeno-canto       | <i>A. farinosa</i>   | inornata   | 2015 | Panama    | Colon       | 9.198742  | -79.979874 |
| 271058    | Xeno-canto       | <i>A. farinosa</i>   | inornata   | 2015 | Panama    | Colon       | 9.198742  | -79.979874 |
| 271056    | Xeno-canto       | <i>A. farinosa</i>   | inornata   | 2015 | Panama    | Colon       | 9.136797  | -79.72363  |
| 31929     | Xeno-canto       | <i>A. farinosa</i>   | inornata   | 2009 | Panama    | Colon       | 9.0334    | -80.1334   |
| 25701     | Macaulay Library | <i>A. farinosa</i>   | inornata   | 1982 | Panama    | Darien      | 7.757099  | -77.683758 |
| 25707     | Macaulay Library | <i>A. farinosa</i>   | inornata   | 1982 | Panama    | Darien      | 7.757099  | -77.683758 |
| 25712     | Macaulay Library | <i>A. farinosa</i>   | inornata   | 1982 | Panama    | Darien      | 7.757099  | -77.683758 |

|           |                  |                      |             |      |            |            |         |          |
|-----------|------------------|----------------------|-------------|------|------------|------------|---------|----------|
| 515000    | Macaulay Library | <i>A. farinosa</i>   | inornata    | 2014 | Panama     | Darien     | 8.015   | -77.7188 |
| 515001    | Macaulay Library | <i>A. farinosa</i>   | inornata    | 2014 | Panama     | Darien     | 8.0177  | -77.7232 |
| 133639181 | Macaulay Library | <i>A. farinosa</i>   | inornata    | 2019 | Panama     | Panama     | 8.9996  | -79.5835 |
| 68664     | Macaulay Library | <i>A. farinosa</i>   | inornata    | 1966 | Venezuela  | Zulia      | 9.58    | -72.78   |
| 68665     | Macaulay Library | <i>A. farinosa</i>   | inornata    | 1966 | Venezuela  | Zulia      | 9.58    | -72.78   |
| 68666     | Macaulay Library | <i>A. farinosa</i>   | inornata    | 1966 | Venezuela  | Zulia      | 9.58    | -72.78   |
| 68667     | Macaulay Library | <i>A. farinosa</i>   | inornata    | 1966 | Venezuela  | Zulia      | 9.58    | -72.78   |
| 68675     | Macaulay Library | <i>A. farinosa</i>   | inornata    | 1970 | Venezuela  | Zulia      | 9.35    | -71.75   |
| 68676     | Macaulay Library | <i>A. farinosa</i>   | inornata    | 1974 | Venezuela  | Zulia      | 10.1    | -72      |
| 27261     | Macaulay Library | <i>A. guatemalae</i> | virenticeps | 1982 | Costa Rica | Puntarenas | 8.5167  | -83.6    |
| 55192     | Macaulay Library | <i>A. guatemalae</i> | virenticeps | 1991 | Costa Rica | Puntarenas | 8.4803  | -83.5893 |
| 73441     | Macaulay Library | <i>A. guatemalae</i> | virenticeps | 1988 | Costa Rica | Puntarenas | 8.4803  | -83.5893 |
| 184276    | Macaulay Library | <i>A. guatemalae</i> | virenticeps | 1995 | Costa Rica | Heredia    | 10.4288 | -84.0128 |
| 184780    | Macaulay Library | <i>A. guatemalae</i> | virenticeps | 1996 | Costa Rica | Heredia    | 10.4288 | -84.0128 |
| 209825    | Macaulay Library | <i>A. guatemalae</i> | virenticeps | 1992 | Costa Rica | Puntarenas | 8.4803  | -83.5893 |
| 209897    | Macaulay Library | <i>A. guatemalae</i> | virenticeps | 1992 | Costa Rica | Puntarenas | 8.4803  | -83.5893 |
| 214535    | Macaulay Library | <i>A. guatemalae</i> | virenticeps | 1988 | Costa Rica | Puntarenas | 8.4803  | -83.5893 |
| 214652    | Macaulay Library | <i>A. guatemalae</i> | virenticeps | 1989 | Costa Rica | Puntarenas | 8.4803  | -83.5893 |
| 215143    | Macaulay Library | <i>A. guatemalae</i> | virenticeps | 1989 | Costa Rica | Puntarenas | 8.4803  | -83.5893 |
| 215148    | Macaulay Library | <i>A. guatemalae</i> | virenticeps | 1989 | Costa Rica | Puntarenas | 8.4803  | -83.5893 |
| 215236    | Macaulay Library | <i>A. guatemalae</i> | virenticeps | 1989 | Costa Rica | Puntarenas | 8.4803  | -83.5893 |
| 215267    | Macaulay Library | <i>A. guatemalae</i> | virenticeps | 1989 | Costa Rica | Puntarenas | 8.4803  | -83.5893 |

**Table S3.** Primer sequences used to amplify and sequence the gene regions used in this study.

| Primer    | Gene  | Sequence                       | Reference                                              |
|-----------|-------|--------------------------------|--------------------------------------------------------|
| 12SrDNAL  | 12S   | GGATTAGATACCCCACTATGC          | Miyaki et al. (1998)                                   |
| 12SrDNAH  | 12S   | AGGGTGACGGGCGGTATGTACG         | Miyaki et al. (1998)                                   |
| 16SrDNAL  | 16S   | TGCGCTACCTTCGCACGGT            | Miyaki et al. (1998)                                   |
| 16SrDNAH  | 16S   | CCTACCGAGCTGGGTGATAGCTGGTT     | Miyaki et al. (1998)                                   |
| COIF      | COI   | CCTGCTGGGGGAGGAGACCC           | Eberhard & Bermingham (2004)                           |
| HCOIP     | COI   | GTRTAGGCRTCTGGRTAGTC           | Wright et al. (2008)                                   |
| TROPF     | TROP  | AATGGCTGCAGAGGATTA             | Lemmonier et al. (1991)                                |
| TROPB     | TROP  | TCCTCTCAAGCTCAGCACA            | Lemmonier et al. (1991)                                |
| TGFB2-F   | TGFB2 | GAAGCGTGCTCTAGATGCTG           | Burt & Patton (1991)                                   |
| TGFB2-R   | TGFB2 | AGGCAGCAATTATCCTGCAC           | Burt & Patton (1991)                                   |
| L5216     | ND2   | GGCCCATACCCCGRAAATG            | Sorenson (2003)                                        |
| H5766     | ND2   | RGAKGAGAARGCYAGGATYTTKCG       | Sorenson (2003)                                        |
| L14841    | CytB  | GCTTCCATCCAACATCTCAGCATGATGAAA | Murphy et al. (2004)                                   |
| H15149    | CytB  | CTGCAGCCCCTCAGAATGATATTTGTCCTC | Murphy et al. (2004)                                   |
| CBL15062p | CytB  | CCGCAGACACCTCTCTAGCC           | Wenner et al. (2012) modified from Ribas et al. (2005) |
| CBH15902  | CytB  | ACTGGTTGACTTCCTACTCATG         | Wenner et al. (2012) modified from Ribas et al. (2005) |

**Table S4.** Genbank accession numbers for new gene sequences used in this study.

| Sample Name | Sample Number | Gene  | Accession Number |
|-------------|---------------|-------|------------------|
| amfar17     | 4223-17       | 12S   | MZ367178         |
|             |               | 16S   | MZ367185         |
|             |               | TROP  | MZ367192         |
|             |               | CytB  | MZ367199         |
|             |               | ND2   | MZ391835         |
| amfar18     | 4223-18       | 12S   | MZ367179         |
|             |               | 16S   | MZ367186         |
|             |               | TROP  | MZ367193         |
|             |               | CytB  | MZ367200         |
|             |               | ND2   | MZ391836         |
| amfar19     | 4223-19       | 12S   | MZ367180         |
|             |               | 16S   | MZ367187         |
|             |               | TROP  | MZ367194         |
|             |               | TGFB2 | MZ391857         |
|             |               | CytB  | MZ367201         |
| amfar20     | 4223-20       | ND2   | MZ391837         |
|             |               | 12S   | MZ367181         |
|             |               | 16S   | MZ367188         |
|             |               | TROP  | MZ367195         |
|             |               | CytB  | MZ367202         |
| amfar21     | 4223-21       | ND2   | MZ391838         |
|             |               | 12S   | MZ367182         |
|             |               | 16S   | MZ367189         |
|             |               | TROP  | MZ367196         |
|             |               | TGFB2 | MZ391858         |
| amfar22     | 4223-22       | CytB  | MZ367203         |
|             |               | ND2   | MZ391839         |
|             |               | 12S   | MZ367183         |
|             |               | 16S   | MZ367190         |
|             |               | TROP  | MZ367197         |
| amfar23     | 4223-23       | CytB  | MZ367204         |
|             |               | ND2   | MZ391840         |
|             |               | 12S   | MZ367184         |
|             |               | 16S   | MZ367191         |
|             |               | TROP  | MZ367198         |
| farin2      | 1474          | TGFB2 | MZ391859         |
|             |               | CytB  | MZ367205         |
|             |               | ND2   | MZ391841         |
|             |               | ND2   | MZ391842         |
|             |               | ND2   | MZ391843         |
| farin3      | 1475          | ND2   | MZ391843         |



|              |         |     |          |
|--------------|---------|-----|----------|
| farin4       | B04253  | ND2 | MZ391844 |
| farin5       | B09182  | ND2 | MZ391845 |
| farin6       | 19984   | ND2 | MZ391846 |
| farin7       | B-10625 | ND2 | MZ391847 |
| farin8       | B9176   | ND2 | MZ391848 |
| chapm1       | B-39761 | ND2 | MZ391849 |
| guate1       | 1472    | ND2 | MZ391850 |
| guate2       | 1473    | ND2 | MZ391851 |
| inorn1       | B-2202  | ND2 | MZ391852 |
| kawal1       | 45642   | ND2 | MZ391853 |
| kawal2       | 45643   | ND2 | MZ391854 |
| auropalliata | 93-39   | ND2 | MZ391855 |
| amazonica    | B12700  | ND2 | MZ391856 |

---

**Table S5.** Acoustic parameters generated by the ‘specan’ function and used in our principal component analysis.

| Record ID | Dur   | Avg Freq | SD    | Freq Med | Freq Q25 | Freq Q75 | Freq IQR | Tim Med | Tim Q25 | Tim Q75 | Tim IQR | Skew  | Kurt   | Sp Entr | Tim Entr | Entr  | Sfm   | Avg Dom | Min Dom | Max Dom | Df rang | Mod Indx | Start Dom | End Dom | Df Slope | Mean Peak Freq |
|-----------|-------|----------|-------|----------|----------|----------|----------|---------|---------|---------|---------|-------|--------|---------|----------|-------|-------|---------|---------|---------|---------|----------|-----------|---------|----------|----------------|
| 2856      | 0.229 | 2.391    | 1.215 | 2.043    | 1.523    | 2.948    | 1.425    | 0.119   | 0.08    | 0.167   | 0.087   | 3.098 | 14.479 | 0.898   | 0.885    | 0.795 | 0.407 | 2.073   | 0.882   | 3.053   | 2.171   | 13.062   | 2.782     | 1.832   | -4.15    | 1.701          |
| 7078      | 0.167 | 3.593    | 1.396 | 3.693    | 2.417    | 4.364    | 1.947    | 0.088   | 0.056   | 0.125   | 0.07    | 3.231 | 19.645 | 0.937   | 0.906    | 0.849 | 0.611 | 3.509   | 1.56    | 4.953   | 3.392   | 9.4      | 3.46      | 2.782   | -4.062   | 4.151          |
| 8421      | 0.208 | 2.606    | 1.264 | 2.207    | 1.837    | 2.856    | 1.019    | 0.12    | 0.088   | 0.16    | 0.072   | 3.011 | 13.237 | 0.889   | 0.889    | 0.79  | 0.414 | 2.161   | 1.56    | 3.053   | 1.493   | 9.455    | 3.053     | 2.51    | -2.609   | 1.974          |
| 11477     | 0.226 | 2.511    | 1.388 | 1.94     | 1.453    | 3.664    | 2.211    | 0.111   | 0.078   | 0.154   | 0.076   | 3.065 | 15.38  | 0.914   | 0.886    | 0.81  | 0.477 | 2.112   | 0.611   | 3.867   | 3.257   | 15.042   | 3.732     | 1.696   | -9.014   | 1.974          |
| 12843     | 0.245 | 3.615    | 1.437 | 3.626    | 2.732    | 4.662    | 1.93     | 0.131   | 0.082   | 0.179   | 0.096   | 1.961 | 7.867  | 0.944   | 0.883    | 0.833 | 0.603 | 3.812   | 1.289   | 5.903   | 4.614   | 14.353   | 4.003     | 1.832   | -8.856   | 3.607          |
| 12864     | 0.251 | 3.695    | 1.606 | 3.75     | 2.37     | 4.847    | 2.476    | 0.119   | 0.084   | 0.16    | 0.075   | 1.561 | 5.503  | 0.957   | 0.881    | 0.843 | 0.692 | 3.365   | 0.611   | 6.038   | 5.428   | 10.95    | 2.782     | 5.767   | 11.9     | 3.062          |
| 17602     | 0.249 | 2.896    | 1.239 | 2.879    | 1.852    | 3.517    | 1.665    | 0.14    | 0.089   | 0.185   | 0.096   | 5.259 | 45.827 | 0.914   | 0.882    | 0.806 | 0.483 | 2.23    | 0.882   | 3.596   | 2.714   | 9.85     | 1.832     | 0.882   | -3.81    | 2.926          |
| 17609     | 0.244 | 2.88     | 1.315 | 2.852    | 1.668    | 3.803    | 2.135    | 0.098   | 0.046   | 0.16    | 0.114   | 2.394 | 10.654 | 0.926   | 0.883    | 0.818 | 0.507 | 2.39    | 1.153   | 4.003   | 2.85    | 11.762   | 1.696     | 1.289   | -1.668   | 2.926          |
| 18184     | 0.271 | 2.541    | 1.342 | 2.014    | 1.534    | 3.595    | 2.061    | 0.148   | 0.098   | 0.2     | 0.102   | 2.666 | 12.013 | 0.921   | 0.879    | 0.809 | 0.5   | 2.163   | 1.153   | 3.732   | 2.578   | 13.105   | 2.51      | 1.56    | -3.506   | 1.974          |
| 24231     | 0.227 | 3.379    | 1.611 | 3.184    | 1.862    | 4.347    | 2.485    | 0.128   | 0.078   | 0.17    | 0.092   | 2.236 | 10.019 | 0.951   | 0.887    | 0.843 | 0.658 | 2.556   | 1.153   | 6.988   | 5.835   | 7.93     | 6.988     | 1.696   | -23.319  | 3.062          |
| 25584     | 0.221 | 3.191    | 1.297 | 3.132    | 2.108    | 4.074    | 1.966    | 0.126   | 0.085   | 0.166   | 0.08    | 1.524 | 5.172  | 0.939   | 0.886    | 0.832 | 0.558 | 2.736   | 1.425   | 4.274   | 2.85    | 12.952   | 3.732     | 2.375   | -6.146   | 1.974          |
| 25701     | 0.222 | 3.499    | 1.563 | 3.25     | 2.091    | 4.53     | 2.439    | 0.101   | 0.055   | 0.151   | 0.096   | 2.144 | 8.998  | 0.951   | 0.888    | 0.845 | 0.668 | 3.078   | 1.696   | 6.174   | 4.478   | 11.515   | 3.053     | 3.324   | 1.223    | 1.974          |
| 25707     | 0.224 | 3.401    | 1.364 | 3.246    | 2.68     | 4.12     | 1.44     | 0.124   | 0.069   | 0.163   | 0.094   | 3.744 | 22.741 | 0.938   | 0.888    | 0.833 | 0.642 | 3.117   | 1.153   | 5.088   | 3.935   | 4.655    | 2.917     | 2.239   | -3.023   | 2.926          |
| 25712     | 0.219 | 3.054    | 1.429 | 3.054    | 1.901    | 3.933    | 2.032    | 0.131   | 0.083   | 0.17    | 0.087   | 2.004 | 8.152  | 0.942   | 0.889    | 0.837 | 0.597 | 2.874   | 0.882   | 4.817   | 3.935   | 10.034   | 2.917     | 1.696   | -5.587   | 3.335          |
| 27261     | 0.19  | 2.317    | 1.03  | 1.871    | 1.665    | 3.162    | 1.497    | 0.104   | 0.074   | 0.137   | 0.062   | 3.468 | 17.398 | 0.859   | 0.896    | 0.769 | 0.292 | 2.206   | 1.018   | 3.324   | 2.307   | 6.882    | 3.324     | 2.103   | -6.434   | 1.837          |
| 31046     | 0.234 | 3.107    | 1.41  | 2.908    | 1.935    | 3.924    | 1.988    | 0.135   | 0.089   | 0.176   | 0.087   | 2.582 | 12.814 | 0.941   | 0.884    | 0.832 | 0.604 | 2.47    | 0.611   | 5.088   | 4.478   | 11.576   | 0.611     | 0.611   | 0        | 2.926          |
| 31510     | 0.3   | 2.842    | 1.328 | 2.581    | 1.972    | 3.081    | 1.109    | 0.146   | 0.082   | 0.2     | 0.118   | 2.977 | 14.761 | 0.914   | 0.876    | 0.8   | 0.505 | 2.175   | 1.153   | 6.174   | 5.021   | 4.162    | 1.425     | 3.053   | 5.42     | 2.11           |
| 31929     | 0.198 | 3.278    | 1.148 | 3.276    | 2.66     | 3.795    | 1.135    | 0.086   | 0.059   | 0.122   | 0.063   | 2.767 | 12.379 | 0.909   | 0.89     | 0.809 | 0.46  | 3.123   | 0.517   | 4.062   | 3.545   | 6.375    | 0.517     | 3.028   | 12.67    | 3.778          |
| 32258     | 0.309 | 3.184    | 1.284 | 3.063    | 2.292    | 4.029    | 1.737    | 0.168   | 0.104   | 0.238   | 0.134   | 2.427 | 10.584 | 0.925   | 0.875    | 0.809 | 0.488 | 3.057   | 1.289   | 4.681   | 3.392   | 15.68    | 3.46      | 1.289   | -7.033   | 2.926          |
| 34475     | 0.232 | 3.072    | 1.181 | 3.053    | 2.156    | 3.834    | 1.678    | 0.122   | 0.078   | 0.165   | 0.087   | 3.753 | 27.26  | 0.923   | 0.885    | 0.816 | 0.496 | 2.804   | 0.611   | 4.003   | 3.392   | 8.08     | 0.611     | 0.611   | 0        | 3.062          |
| 38870     | 0.282 | 2.945    | 1.521 | 2.41     | 1.712    | 4.044    | 2.332    | 0.162   | 0.105   | 0.209   | 0.105   | 3.146 | 15.791 | 0.928   | 0.877    | 0.814 | 0.553 | 2.087   | 1.153   | 4.274   | 3.121   | 17.565   | 1.968     | 2.782   | 2.885    | 1.837          |
| 39015     | 0.249 | 3.265    | 1.339 | 3.267    | 2.401    | 3.896    | 1.496    | 0.137   | 0.101   | 0.169   | 0.069   | 2.656 | 12.213 | 0.94    | 0.88     | 0.827 | 0.605 | 3.07    | 1.832   | 4.41    | 2.578   | 9.895    | 3.324     | 2.782   | -2.176   | 3.607          |
| 45539     | 0.262 | 3.288    | 1.366 | 3.053    | 2.048    | 4.058    | 2.01     | 0.118   | 0.073   | 0.171   | 0.098   | 3.083 | 15.404 | 0.929   | 0.88     | 0.818 | 0.564 | 2.919   | 1.289   | 4.139   | 2.85    | 13.238   | 3.46      | 1.289   | -8.295   | 3.199          |
| 45803     | 0.239 | 3.002    | 1.48  | 3.021    | 1.796    | 3.777    | 1.981    | 0.161   | 0.078   | 0.193   | 0.115   | 1.853 | 6.981  | 0.948   | 0.883    | 0.838 | 0.64  | 2.332   | 0.611   | 3.867   | 3.257   | 16.875   | 0.611     | 1.832   | 5.104    | 1.837          |
| 48956     | 0.266 | 3.436    | 1.507 | 3.379    | 2.201    | 4.463    | 2.262    | 0.131   | 0.082   | 0.181   | 0.099   | 2.214 | 10.387 | 0.954   | 0.88     | 0.839 | 0.672 | 3.037   | 0.611   | 4.139   | 3.528   | 19.038   | 0.611     | 2.103   | 5.617    | 3.879          |
| 49309     | 0.223 | 2.782    | 1.371 | 2.575    | 1.794    | 3.573    | 1.779    | 0.11    | 0.067   | 0.156   | 0.09    | 3.766 | 26.439 | 0.926   | 0.888    | 0.823 | 0.551 | 2.03    | 0.882   | 3.596   | 2.714   | 12       | 1.832     | 1.56    | -1.218   | 1.974          |

|       |       |       |       |       |       |       |       |       |       |       |       |       |        |       |       |       |       |       |       |       |       |        |       |       |         |       |
|-------|-------|-------|-------|-------|-------|-------|-------|-------|-------|-------|-------|-------|--------|-------|-------|-------|-------|-------|-------|-------|-------|--------|-------|-------|---------|-------|
| 51329 | 0.214 | 2.215 | 1.234 | 1.816 | 1.415 | 2.791 | 1.377 | 0.115 | 0.069 | 0.154 | 0.085 | 3.544 | 20.266 | 0.886 | 0.889 | 0.788 | 0.396 | 1.89  | 0.611 | 6.852 | 6.242 | 4.978  | 1.018 | 5.496 | 20.882  | 1.837 |
| 51354 | 0.267 | 2.753 | 1.43  | 2.613 | 1.577 | 3.682 | 2.105 | 0.141 | 0.098 | 0.185 | 0.087 | 2.973 | 17.255 | 0.931 | 0.879 | 0.818 | 0.537 | 2.215 | 0.611 | 5.903 | 5.292 | 10.231 | 0.611 | 2.375 | 6.619   | 1.837 |
| 52065 | 0.232 | 3.176 | 1.395 | 3.08  | 2.09  | 4.26  | 2.17  | 0.124 | 0.064 | 0.174 | 0.11  | 2.357 | 11.526 | 0.93  | 0.886 | 0.824 | 0.513 | 2.826 | 1.425 | 4.681 | 3.257 | 13.083 | 1.832 | 3.46  | 7.034   | 1.565 |
| 52351 | 0.284 | 2.599 | 1.107 | 2.714 | 1.707 | 3.206 | 1.499 | 0.155 | 0.118 | 0.202 | 0.084 | 2.977 | 13.815 | 0.9   | 0.876 | 0.788 | 0.373 | 2.501 | 1.153 | 3.46  | 2.307 | 11.706 | 3.46  | 2.782 | -2.387  | 2.926 |
| 53405 | 0.316 | 2.854 | 1.331 | 3.08  | 1.584 | 3.444 | 1.86  | 0.17  | 0.107 | 0.22  | 0.114 | 3.52  | 19.312 | 0.906 | 0.873 | 0.791 | 0.464 | 2.399 | 0.611 | 3.732 | 3.121 | 19.652 | 0.611 | 1.153 | 1.719   | 3.471 |
| 55192 | 0.212 | 4.011 | 1.457 | 4.048 | 2.867 | 4.95  | 2.083 | 0.108 | 0.076 | 0.152 | 0.076 | 3.329 | 21.632 | 0.938 | 0.888 | 0.833 | 0.549 | 3.54  | 0.746 | 5.36  | 4.614 | 9.853  | 5.088 | 4.681 | -1.922  | 4.151 |
| 63112 | 0.325 | 2.462 | 1.292 | 2.146 | 1.432 | 3.121 | 1.689 | 0.141 | 0.089 | 0.207 | 0.118 | 3.101 | 15.652 | 0.916 | 0.874 | 0.8   | 0.478 | 1.851 | 0.611 | 5.224 | 4.614 | 11.147 | 2.917 | 0.611 | -7.095  | 2.926 |
| 63143 | 0.231 | 3.074 | 1.419 | 3.006 | 1.885 | 3.901 | 2.017 | 0.112 | 0.064 | 0.156 | 0.092 | 2.677 | 15.247 | 0.942 | 0.886 | 0.835 | 0.607 | 2.661 | 1.289 | 4.003 | 2.714 | 15.45  | 1.968 | 3.189 | 5.284   | 3.199 |
| 65238 | 0.24  | 3.243 | 1.299 | 3.088 | 2.235 | 3.887 | 1.652 | 0.135 | 0.092 | 0.179 | 0.087 | 2.736 | 12.934 | 0.929 | 0.883 | 0.821 | 0.545 | 2.74  | 1.018 | 6.581 | 5.563 | 5.415  | 6.581 | 1.153 | -22.585 | 3.062 |
| 68660 | 0.252 | 3.043 | 1.124 | 3.151 | 2.004 | 3.774 | 1.77  | 0.126 | 0.08  | 0.17  | 0.089 | 3.374 | 21.551 | 0.908 | 0.881 | 0.799 | 0.364 | 3.025 | 0.611 | 6.174 | 5.563 | 8.951  | 4.274 | 1.153 | -12.383 | 3.199 |
| 68662 | 0.22  | 3.599 | 1.211 | 3.322 | 2.758 | 4.346 | 1.589 | 0.117 | 0.071 | 0.16  | 0.089 | 2.539 | 12.13  | 0.915 | 0.888 | 0.812 | 0.448 | 3.427 | 2.103 | 4.546 | 2.442 | 18.556 | 4.003 | 2.646 | -6.173  | 3.199 |
| 68664 | 0.158 | 3.419 | 1.197 | 3.177 | 2.911 | 4.228 | 1.316 | 0.086 | 0.056 | 0.116 | 0.06  | 4.661 | 32.289 | 0.893 | 0.91  | 0.813 | 0.432 | 3.635 | 1.289 | 4.817 | 3.528 | 6.731  | 1.289 | 4.139 | 18.029  | 3.199 |
| 68665 | 0.189 | 3.229 | 0.986 | 3.228 | 2.624 | 3.896 | 1.271 | 0.101 | 0.069 | 0.131 | 0.062 | 2.825 | 15.489 | 0.894 | 0.895 | 0.8   | 0.337 | 3.324 | 0.611 | 4.546 | 3.935 | 5.966  | 3.867 | 3.732 | -0.719  | 3.062 |
| 68666 | 0.153 | 3.238 | 1.107 | 3.02  | 2.601 | 4.002 | 1.401 | 0.089 | 0.056 | 0.115 | 0.059 | 3.467 | 17.903 | 0.889 | 0.912 | 0.81  | 0.395 | 3.111 | 0.611 | 6.31  | 5.699 | 3.595  | 1.289 | 0.611 | -4.438  | 2.926 |
| 68666 | 0.181 | 3.467 | 1.11  | 3.587 | 2.807 | 4.229 | 1.422 | 0.104 | 0.07  | 0.132 | 0.063 | 2.587 | 11.019 | 0.901 | 0.897 | 0.809 | 0.396 | 3.691 | 1.832 | 4.681 | 2.85  | 6.286  | 3.596 | 2.239 | -7.501  | 3.879 |
| 68667 | 0.159 | 3.469 | 1.336 | 3.527 | 2.872 | 4.389 | 1.516 | 0.096 | 0.068 | 0.124 | 0.056 | 5.255 | 40.43  | 0.882 | 0.907 | 0.8   | 0.434 | 3.445 | 0.611 | 4.817 | 4.206 | 5.742  | 3.867 | 0.611 | -20.488 | 3.062 |
| 68667 | 0.18  | 3.358 | 1.299 | 3.545 | 2.192 | 4.172 | 1.98  | 0.109 | 0.069 | 0.139 | 0.069 | 1.519 | 4.651  | 0.921 | 0.898 | 0.827 | 0.486 | 3.697 | 0.746 | 6.445 | 5.699 | 5.619  | 0.746 | 1.832 | 6.019   | 3.743 |
| 68670 | 0.191 | 3.22  | 1.065 | 3.088 | 2.309 | 3.967 | 1.658 | 0.108 | 0.065 | 0.143 | 0.078 | 3.637 | 21.575 | 0.878 | 0.896 | 0.787 | 0.327 | 2.917 | 1.153 | 4.546 | 3.392 | 4.32   | 3.053 | 1.153 | -9.927  | 3.199 |
| 68670 | 0.208 | 3.167 | 1.125 | 2.914 | 2.341 | 3.796 | 1.455 | 0.097 | 0.058 | 0.136 | 0.078 | 3.732 | 20.432 | 0.88  | 0.891 | 0.784 | 0.379 | 2.778 | 0.611 | 3.867 | 3.257 | 7      | 0.882 | 0.611 | -1.307  | 2.382 |
| 68672 | 0.223 | 2.829 | 1.301 | 2.65  | 1.732 | 3.954 | 2.222 | 0.129 | 0.088 | 0.168 | 0.081 | 1.885 | 7.409  | 0.924 | 0.886 | 0.819 | 0.432 | 2.683 | 1.153 | 4.274 | 3.121 | 18     | 3.189 | 4.003 | 3.645   | 4.151 |
| 68673 | 0.183 | 2.716 | 1.237 | 2.505 | 1.773 | 3.663 | 1.89  | 0.102 | 0.07  | 0.127 | 0.058 | 3.12  | 17.509 | 0.906 | 0.896 | 0.812 | 0.416 | 2.342 | 0.611 | 3.867 | 3.257 | 10.25  | 3.867 | 0.611 | -17.788 | 1.974 |
| 68675 | 0.164 | 3.344 | 1.533 | 3.442 | 2.017 | 4.179 | 2.163 | 0.091 | 0.049 | 0.124 | 0.075 | 1.778 | 6.094  | 0.943 | 0.908 | 0.856 | 0.627 | 3.131 | 0.882 | 4.681 | 3.799 | 8.857  | 3.189 | 4.003 | 4.958   | 3.879 |
| 68676 | 0.176 | 2.959 | 1.327 | 2.633 | 1.952 | 3.829 | 1.877 | 0.086 | 0.06  | 0.116 | 0.056 | 2.406 | 9.865  | 0.924 | 0.898 | 0.829 | 0.529 | 2.687 | 0.882 | 4.139 | 3.257 | 4.5    | 4.139 | 0.882 | -18.457 | 1.974 |
| 70800 | 0.182 | 2.792 | 1.333 | 2.309 | 1.897 | 3.503 | 1.606 | 0.093 | 0.058 | 0.131 | 0.072 | 4.447 | 31.23  | 0.914 | 0.9   | 0.823 | 0.517 | 2.049 | 1.56  | 3.46  | 1.9   | 4.571  | 3.46  | 1.832 | -8.948  | 1.974 |
| 70801 | 0.199 | 2.663 | 1.29  | 2.227 | 1.769 | 3.571 | 1.802 | 0.097 | 0.06  | 0.136 | 0.076 | 3.813 | 24.734 | 0.914 | 0.893 | 0.816 | 0.489 | 2.161 | 1.425 | 3.732 | 2.307 | 5.353  | 3.732 | 1.425 | -11.607 | 1.974 |
| 70818 | 0.258 | 2.431 | 1.238 | 2.022 | 1.548 | 3.086 | 1.538 | 0.116 | 0.071 | 0.166 | 0.096 | 2.794 | 12.717 | 0.91  | 0.881 | 0.801 | 0.441 | 1.913 | 0.611 | 4.546 | 3.935 | 7.69   | 0.611 | 1.018 | 1.58    | 1.974 |
| 70873 | 0.228 | 2.634 | 1.292 | 2.143 | 1.88  | 3.106 | 1.226 | 0.115 | 0.078 | 0.162 | 0.083 | 4.804 | 35.949 | 0.907 | 0.886 | 0.803 | 0.496 | 2.274 | 1.56  | 4.274 | 2.714 | 9.85   | 1.832 | 3.053 | 5.346   | 1.974 |
| 71093 | 0.188 | 3.099 | 1.481 | 2.546 | 1.933 | 4.144 | 2.211 | 0.074 | 0.044 | 0.121 | 0.077 | 3.245 | 16.838 | 0.937 | 0.897 | 0.841 | 0.626 | 2.289 | 0.611 | 5.903 | 5.292 | 3.821  | 3.732 | 1.696 | -10.839 | 2.11  |
| 71094 | 0.221 | 2.655 | 1.236 | 2.32  | 1.804 | 3.207 | 1.403 | 0.106 | 0.067 | 0.15  | 0.083 | 2.19  | 8.454  | 0.919 | 0.887 | 0.816 | 0.483 | 2.157 | 0.611 | 3.732 | 3.121 | 6.652  | 3.732 | 0.611 | -14.119 | 2.11  |

|        |       |       |       |       |       |       |       |       |       |       |       |       |        |       |       |       |       |       |       |       |       |        |       |       |         |       |
|--------|-------|-------|-------|-------|-------|-------|-------|-------|-------|-------|-------|-------|--------|-------|-------|-------|-------|-------|-------|-------|-------|--------|-------|-------|---------|-------|
| 71113  | 0.21  | 2.59  | 1.422 | 1.91  | 1.633 | 3.629 | 1.995 | 0.097 | 0.055 | 0.143 | 0.088 | 4.388 | 25.985 | 0.895 | 0.891 | 0.798 | 0.487 | 1.938 | 1.289 | 6.581 | 5.292 | 4.436  | 1.832 | 6.581 | 22.614  | 1.701 |
| 73441  | 0.219 | 3.093 | 1.268 | 3.116 | 1.974 | 3.878 | 1.903 | 0.108 | 0.069 | 0.15  | 0.081 | 2.723 | 11.965 | 0.909 | 0.888 | 0.807 | 0.457 | 2.745 | 1.018 | 6.31  | 5.292 | 9.359  | 4.003 | 1.968 | -9.287  | 1.974 |
| 80212  | 0.169 | 2.852 | 1.378 | 2.45  | 1.824 | 3.862 | 2.039 | 0.088 | 0.053 | 0.118 | 0.065 | 4.759 | 36.66  | 0.908 | 0.904 | 0.821 | 0.491 | 2.062 | 0.611 | 4.41  | 3.799 | 8.429  | 0.611 | 0.611 | 0       | 1.974 |
| 80224  | 0.203 | 3.122 | 1.325 | 3.263 | 1.877 | 3.888 | 2.011 | 0.102 | 0.069 | 0.132 | 0.062 | 4.104 | 26.816 | 0.913 | 0.891 | 0.814 | 0.509 | 2.693 | 0.611 | 4.817 | 4.206 | 10.258 | 0.611 | 1.968 | 6.671   | 1.837 |
| 81822  | 0.237 | 3.076 | 1.284 | 2.93  | 1.884 | 3.828 | 1.945 | 0.124 | 0.084 | 0.172 | 0.088 | 2.751 | 13.62  | 0.922 | 0.883 | 0.814 | 0.477 | 2.402 | 1.551 | 4.062 | 2.511 | 10.059 | 1.994 | 1.846 | -0.623  | 2.889 |
| 82439  | 0.196 | 3.032 | 1.354 | 2.646 | 2.106 | 4.007 | 1.902 | 0.111 | 0.083 | 0.143 | 0.06  | 2.886 | 13.445 | 0.925 | 0.893 | 0.825 | 0.536 | 2.494 | 0.611 | 4.817 | 4.206 | 5.677  | 0.611 | 0.611 | 0       | 2.246 |
| 84846  | 0.228 | 2.913 | 1.149 | 3.029 | 1.99  | 3.507 | 1.517 | 0.097 | 0.062 | 0.152 | 0.09  | 4.306 | 28.726 | 0.895 | 0.886 | 0.793 | 0.401 | 2.779 | 1.289 | 3.596 | 2.307 | 10.588 | 2.103 | 1.832 | -1.189  | 3.199 |
| 84847  | 0.268 | 3.353 | 1.361 | 3.284 | 2.254 | 4.306 | 2.052 | 0.115 | 0.069 | 0.179 | 0.11  | 2.442 | 11.36  | 0.936 | 0.879 | 0.823 | 0.562 | 2.835 | 0.611 | 3.867 | 3.257 | 8.75   | 0.611 | 0.611 | 0       | 3.743 |
| 87835  | 0.232 | 2.539 | 1.166 | 2.569 | 1.634 | 3.315 | 1.681 | 0.124 | 0.085 | 0.175 | 0.09  | 3.24  | 16.418 | 0.893 | 0.885 | 0.79  | 0.352 | 2.141 | 0.611 | 4.274 | 3.664 | 5.593  | 2.917 | 0.611 | -9.94   | 2.79  |
| 88961  | 0.246 | 2.637 | 1.126 | 2.648 | 1.676 | 3.368 | 1.692 | 0.138 | 0.101 | 0.175 | 0.074 | 2.292 | 10.522 | 0.91  | 0.881 | 0.802 | 0.388 | 2.236 | 0.611 | 3.867 | 3.257 | 8.833  | 3.867 | 0.611 | -13.241 | 1.701 |
| 90896  | 0.301 | 1.831 | 0.96  | 1.507 | 1.295 | 1.946 | 0.652 | 0.16  | 0.107 | 0.212 | 0.105 | 3.881 | 22.507 | 0.857 | 0.876 | 0.75  | 0.228 | 1.759 | 0.882 | 3.053 | 2.171 | 5.75   | 1.56  | 1.56  | 0       | 1.429 |
| 101880 | 0.347 | 2.268 | 1.303 | 1.703 | 1.415 | 3.022 | 1.606 | 0.177 | 0.114 | 0.248 | 0.134 | 3.91  | 22.686 | 0.888 | 0.872 | 0.774 | 0.401 | 1.602 | 0.611 | 3.053 | 2.442 | 6.167  | 2.375 | 0.611 | -5.077  | 1.837 |
| 113339 | 0.205 | 3.554 | 1.372 | 3.562 | 2.772 | 4.04  | 1.268 | 0.099 | 0.074 | 0.141 | 0.067 | 3.063 | 14.678 | 0.924 | 0.889 | 0.822 | 0.55  | 3.034 | 0.611 | 6.988 | 6.378 | 4.191  | 6.988 | 0.611 | -31.099 | 3.879 |
| 113353 | 0.279 | 3.235 | 1.363 | 3.528 | 1.804 | 4.37  | 2.566 | 0.133 | 0.085 | 0.192 | 0.108 | 3.245 | 14.921 | 0.9   | 0.878 | 0.79  | 0.436 | 2.675 | 0.611 | 4.546 | 3.935 | 6.69   | 0.611 | 0.611 | 0       | 3.743 |
| 115064 | 0.246 | 3.413 | 1.473 | 3.487 | 2.016 | 4.323 | 2.307 | 0.122 | 0.085 | 0.17  | 0.085 | 2.083 | 8.524  | 0.946 | 0.882 | 0.835 | 0.619 | 3.111 | 1.153 | 4.41  | 3.257 | 14.25  | 3.867 | 1.968 | -7.737  | 4.287 |
| 115064 | 0.246 | 2.632 | 1.244 | 2.187 | 1.792 | 3.54  | 1.748 | 0.126 | 0.094 | 0.172 | 0.078 | 2.976 | 14.353 | 0.904 | 0.881 | 0.797 | 0.415 | 2.136 | 0.611 | 4.681 | 4.071 | 10     | 3.053 | 0.611 | -9.948  | 1.974 |
| 123325 | 0.321 | 2.537 | 1.14  | 2.302 | 1.706 | 3.293 | 1.587 | 0.146 | 0.088 | 0.217 | 0.129 | 2.818 | 14.281 | 0.915 | 0.874 | 0.799 | 0.409 | 2.101 | 0.96  | 5.982 | 5.022 | 11.324 | 2.88  | 5.982 | 9.664   | 1.852 |
| 123339 | 0.279 | 2.839 | 1.281 | 2.713 | 1.804 | 3.662 | 1.859 | 0.125 | 0.075 | 0.188 | 0.113 | 2.461 | 10.855 | 0.928 | 0.878 | 0.814 | 0.522 | 2.36  | 0.517 | 3.914 | 3.397 | 15.652 | 2.88  | 0.517 | -8.459  | 1.852 |
| 125983 | 0.234 | 3.164 | 1.188 | 2.977 | 2.308 | 3.636 | 1.328 | 0.149 | 0.105 | 0.183 | 0.078 | 3.327 | 17.221 | 0.904 | 0.883 | 0.799 | 0.44  | 2.847 | 0.611 | 4.274 | 3.664 | 5.593  | 3.867 | 1.289 | -11.041 | 3.062 |
| 125985 | 0.319 | 3.279 | 1.426 | 3.099 | 2.168 | 4.31  | 2.142 | 0.159 | 0.105 | 0.221 | 0.116 | 3.656 | 29.094 | 0.935 | 0.874 | 0.817 | 0.568 | 2.562 | 1.832 | 4.546 | 2.714 | 16.05  | 3.46  | 2.239 | -3.829  | 2.246 |
| 134601 | 0.236 | 2.672 | 1.399 | 2.371 | 1.633 | 3.627 | 1.994 | 0.114 | 0.064 | 0.172 | 0.108 | 3.313 | 21.059 | 0.927 | 0.885 | 0.821 | 0.531 | 1.871 | 0.882 | 3.867 | 2.985 | 11.455 | 1.832 | 1.289 | -2.301  | 1.837 |
| 137679 | 0.206 | 3.123 | 1.317 | 2.993 | 2.11  | 3.828 | 1.717 | 0.109 | 0.07  | 0.146 | 0.076 | 1.398 | 4.863  | 0.94  | 0.892 | 0.838 | 0.562 | 2.853 | 0.611 | 4.274 | 3.664 | 8.333  | 4.274 | 0.611 | -17.762 | 3.062 |
| 139413 | 0.201 | 3.625 | 1.436 | 3.529 | 2.504 | 4.603 | 2.099 | 0.099 | 0.062 | 0.139 | 0.076 | 1.292 | 5.149  | 0.957 | 0.893 | 0.855 | 0.626 | 3.359 | 1.56  | 5.088 | 3.528 | 12.692 | 4.139 | 3.324 | -4.049  | 4.151 |
| 147326 | 0.203 | 2.813 | 1.379 | 2.76  | 1.672 | 3.548 | 1.876 | 0.106 | 0.069 | 0.145 | 0.076 | 4.678 | 41.136 | 0.93  | 0.892 | 0.83  | 0.57  | 2.074 | 0.611 | 3.732 | 3.121 | 7.696  | 2.917 | 0.611 | -11.351 | 1.701 |
| 163579 | 0.293 | 2.507 | 1.409 | 2.1   | 1.449 | 3.445 | 1.996 | 0.118 | 0.066 | 0.175 | 0.109 | 2.576 | 12.308 | 0.933 | 0.877 | 0.817 | 0.549 | 1.811 | 0.746 | 4.139 | 3.392 | 11.68  | 2.782 | 1.696 | -3.704  | 1.837 |
| 166780 | 0.325 | 2.916 | 1.308 | 2.766 | 1.893 | 3.559 | 1.667 | 0.141 | 0.089 | 0.209 | 0.121 | 2.879 | 13.862 | 0.928 | 0.873 | 0.81  | 0.54  | 2.389 | 0.611 | 3.867 | 3.257 | 12.958 | 1.968 | 0.746 | -3.753  | 2.79  |
| 171588 | 0.223 | 3.112 | 1.437 | 3.056 | 1.897 | 4.004 | 2.107 | 0.112 | 0.064 | 0.154 | 0.09  | 1.622 | 5.87   | 0.944 | 0.888 | 0.838 | 0.608 | 2.442 | 0.746 | 5.088 | 4.342 | 15.312 | 2.782 | 1.425 | -6.093  | 1.565 |
| 184276 | 0.156 | 3.086 | 1.434 | 2.952 | 1.929 | 3.917 | 1.989 | 0.088 | 0.058 | 0.114 | 0.056 | 2.098 | 8.326  | 0.931 | 0.909 | 0.847 | 0.568 | 2.448 | 1.289 | 4.139 | 2.85  | 10.048 | 3.867 | 1.832 | -13.087 | 1.974 |
| 184780 | 0.138 | 2.346 | 1.077 | 1.961 | 1.671 | 2.872 | 1.2   | 0.075 | 0.047 | 0.103 | 0.056 | 3.11  | 14.472 | 0.878 | 0.92  | 0.808 | 0.354 | 2.026 | 1.425 | 3.46  | 2.035 | 8      | 2.51  | 3.053 | 3.922   | 1.974 |

|        |       |       |       |       |       |       |       |       |       |       |       |       |        |       |       |       |       |       |       |       |       |        |       |       |         |       |
|--------|-------|-------|-------|-------|-------|-------|-------|-------|-------|-------|-------|-------|--------|-------|-------|-------|-------|-------|-------|-------|-------|--------|-------|-------|---------|-------|
| 189434 | 0.243 | 2.332 | 1.32  | 1.872 | 1.431 | 3.029 | 1.598 | 0.137 | 0.089 | 0.181 | 0.092 | 3.719 | 21.739 | 0.885 | 0.883 | 0.782 | 0.403 | 1.69  | 1.153 | 2.103 | 0.95  | 11.714 | 1.696 | 1.968 | 1.118   | 1.429 |
| 209825 | 0.214 | 3.305 | 1.354 | 3.282 | 2.205 | 3.928 | 1.723 | 0.108 | 0.06  | 0.147 | 0.087 | 2.949 | 17.148 | 0.938 | 0.89  | 0.835 | 0.598 | 3.066 | 0.882 | 4.003 | 3.121 | 11.565 | 0.882 | 3.867 | 13.973  | 3.879 |
| 209897 | 0.225 | 2.976 | 1.283 | 2.771 | 1.934 | 3.808 | 1.874 | 0.117 | 0.069 | 0.167 | 0.099 | 2.688 | 12.006 | 0.92  | 0.887 | 0.817 | 0.514 | 2.537 | 0.611 | 5.767 | 5.156 | 9.658  | 5.767 | 1.832 | -17.506 | 1.974 |
| 214535 | 0.242 | 2.736 | 1.295 | 2.403 | 1.684 | 3.686 | 2.002 | 0.114 | 0.059 | 0.153 | 0.094 | 3.104 | 17.065 | 0.901 | 0.883 | 0.795 | 0.416 | 2.454 | 0.611 | 6.852 | 6.242 | 11.478 | 0.611 | 0.611 | 0       | 1.974 |
| 214652 | 0.208 | 3.027 | 1.373 | 2.842 | 1.96  | 3.834 | 1.874 | 0.101 | 0.06  | 0.143 | 0.083 | 3.086 | 19.094 | 0.934 | 0.892 | 0.832 | 0.584 | 2.646 | 1.289 | 3.732 | 2.442 | 10.333 | 3.46  | 1.56  | -9.151  | 2.11  |
| 215143 | 0.203 | 2.886 | 1.127 | 2.923 | 1.962 | 3.716 | 1.753 | 0.104 | 0.065 | 0.143 | 0.078 | 3.071 | 18.749 | 0.902 | 0.892 | 0.805 | 0.406 | 2.402 | 1.289 | 3.867 | 2.578 | 10.737 | 2.917 | 2.103 | -4.008  | 1.974 |
| 215148 | 0.18  | 2.236 | 1.068 | 1.863 | 1.557 | 2.615 | 1.057 | 0.114 | 0.063 | 0.135 | 0.072 | 3.44  | 15.998 | 0.842 | 0.898 | 0.756 | 0.264 | 1.895 | 0.746 | 3.732 | 2.985 | 5.091  | 2.917 | 2.103 | -4.529  | 1.974 |
| 215236 | 0.196 | 2.681 | 1.208 | 2.447 | 1.783 | 3.602 | 1.819 | 0.106 | 0.06  | 0.141 | 0.081 | 2.861 | 15.28  | 0.909 | 0.894 | 0.812 | 0.435 | 2.422 | 1.153 | 4.003 | 2.85  | 9.524  | 4.003 | 3.189 | -4.158  | 1.837 |
| 215267 | 0.178 | 2.424 | 1.119 | 2.018 | 1.664 | 2.946 | 1.282 | 0.092 | 0.051 | 0.129 | 0.079 | 7.36  | 88.06  | 0.875 | 0.9   | 0.788 | 0.345 | 2.206 | 1.289 | 3.867 | 2.578 | 6.474  | 3.053 | 3.732 | 3.812   | 1.837 |
| 218370 | 0.244 | 2.672 | 1.278 | 2.381 | 1.639 | 3.488 | 1.848 | 0.125 | 0.094 | 0.16  | 0.066 | 3.076 | 17.205 | 0.917 | 0.881 | 0.808 | 0.484 | 2.007 | 0.611 | 5.36  | 4.749 | 8.114  | 2.646 | 5.36  | 11.119  | 1.974 |
| 227732 | 0.338 | 2.583 | 1.316 | 2.412 | 1.546 | 3.426 | 1.88  | 0.195 | 0.12  | 0.259 | 0.139 | 2.261 | 9.77   | 0.933 | 0.873 | 0.814 | 0.519 | 2.12  | 0.746 | 4.003 | 3.257 | 10.458 | 3.053 | 1.56  | -4.41   | 3.607 |
| 246368 | 0.193 | 2.476 | 1.215 | 2.212 | 1.488 | 3.013 | 1.525 | 0.101 | 0.055 | 0.143 | 0.088 | 3.059 | 14.678 | 0.894 | 0.895 | 0.801 | 0.387 | 1.964 | 1.425 | 3.053 | 1.628 | 7.083  | 1.696 | 2.646 | 4.911   | 1.565 |
| 251991 | 0.229 | 2.906 | 1.328 | 2.901 | 1.735 | 3.647 | 1.912 | 0.115 | 0.073 | 0.163 | 0.089 | 2.281 | 9.729  | 0.928 | 0.886 | 0.822 | 0.538 | 2.678 | 1.289 | 4.139 | 2.85  | 15.238 | 3.596 | 3.324 | -1.184  | 3.471 |
| 252219 | 0.208 | 2.72  | 1.198 | 2.763 | 1.812 | 3.44  | 1.629 | 0.099 | 0.056 | 0.143 | 0.088 | 2.084 | 8.309  | 0.921 | 0.892 | 0.821 | 0.472 | 2.568 | 1.289 | 4.274 | 2.985 | 12     | 3.596 | 1.968 | -7.82   | 1.974 |
| 252671 | 0.185 | 3.097 | 1.267 | 2.99  | 2.107 | 3.764 | 1.656 | 0.092 | 0.058 | 0.132 | 0.074 | 1.785 | 6.312  | 0.934 | 0.898 | 0.838 | 0.56  | 2.68  | 0.611 | 3.867 | 3.257 | 7.833  | 3.867 | 0.611 | -17.617 | 3.062 |
| 252986 | 0.243 | 2.851 | 1.193 | 2.924 | 1.86  | 3.521 | 1.661 | 0.117 | 0.078 | 0.167 | 0.089 | 1.716 | 6.071  | 0.929 | 0.882 | 0.82  | 0.498 | 2.463 | 0.611 | 4.139 | 3.528 | 8.885  | 2.917 | 4.139 | 5.03    | 1.837 |
| 252987 | 0.209 | 2.687 | 1.275 | 2.423 | 1.643 | 3.604 | 1.961 | 0.087 | 0.048 | 0.136 | 0.087 | 2.276 | 9.188  | 0.919 | 0.891 | 0.819 | 0.476 | 2.084 | 1.289 | 4.681 | 3.392 | 11.84  | 3.324 | 1.696 | -7.787  | 1.837 |
| 253107 | 0.255 | 2.821 | 1.356 | 2.811 | 1.732 | 3.666 | 1.934 | 0.118 | 0.077 | 0.166 | 0.089 | 2.578 | 10.999 | 0.928 | 0.88  | 0.817 | 0.54  | 2.553 | 0.611 | 6.174 | 5.563 | 10.463 | 0.611 | 3.732 | 12.239  | 3.062 |
| 253591 | 0.21  | 2.447 | 1.167 | 2.071 | 1.618 | 3.303 | 1.686 | 0.113 | 0.074 | 0.157 | 0.083 | 2.201 | 8.62   | 0.908 | 0.89  | 0.808 | 0.416 | 2.264 | 1.153 | 5.767 | 4.614 | 7.735  | 1.56  | 3.324 | 8.419   | 1.837 |
| 255378 | 0.203 | 2.637 | 1.444 | 2.104 | 1.527 | 3.58  | 2.053 | 0.092 | 0.048 | 0.138 | 0.09  | 2.981 | 14.899 | 0.919 | 0.893 | 0.82  | 0.515 | 1.591 | 0.611 | 3.189 | 2.578 | 8.579  | 0.611 | 1.56  | 4.684   | 1.974 |
| 255843 | 0.262 | 2.719 | 1.358 | 2.356 | 1.665 | 3.697 | 2.032 | 0.132 | 0.082 | 0.178 | 0.096 | 2.435 | 10.299 | 0.923 | 0.88  | 0.812 | 0.516 | 2.245 | 1.289 | 3.867 | 2.578 | 15.632 | 3.324 | 3.732 | 1.554   | 1.837 |
| 257702 | 0.332 | 2.426 | 1.388 | 2.257 | 1.363 | 3.093 | 1.73  | 0.147 | 0.086 | 0.224 | 0.138 | 1.841 | 6.326  | 0.922 | 0.873 | 0.805 | 0.465 | 2.192 | 1.153 | 3.46  | 2.307 | 25.529 | 3.46  | 1.56  | -5.714  | 1.565 |
| 260390 | 0.239 | 3.271 | 1.336 | 3.124 | 2.325 | 4.037 | 1.712 | 0.119 | 0.08  | 0.161 | 0.08  | 3.01  | 16.207 | 0.937 | 0.884 | 0.828 | 0.589 | 3.082 | 0.746 | 5.224 | 4.478 | 8.03   | 5.224 | 2.375 | -11.924 | 3.199 |
| 269007 | 0.157 | 2.812 | 1.293 | 2.885 | 1.708 | 3.775 | 2.067 | 0.08  | 0.042 | 0.113 | 0.07  | 1.575 | 5.782  | 0.928 | 0.912 | 0.846 | 0.49  | 2.389 | 0.882 | 4.003 | 3.121 | 6.217  | 3.189 | 1.968 | -7.766  | 1.837 |
| 270699 | 0.319 | 2.92  | 1.395 | 2.691 | 1.954 | 4.079 | 2.125 | 0.149 | 0.095 | 0.208 | 0.113 | 3.361 | 23.01  | 0.935 | 0.874 | 0.817 | 0.569 | 2.14  | 1.018 | 4.546 | 3.528 | 13.885 | 2.782 | 2.375 | -1.275  | 2.11  |
| 270851 | 0.26  | 2.958 | 1.269 | 2.475 | 2.175 | 3.896 | 1.721 | 0.132 | 0.096 | 0.183 | 0.087 | 7.709 | 79.008 | 0.886 | 0.88  | 0.779 | 0.448 | 2.606 | 0.611 | 6.038 | 5.428 | 8.45   | 2.782 | 0.611 | -8.34   | 2.518 |
| 270868 | 0.233 | 3.145 | 1.376 | 2.903 | 2     | 4.279 | 2.278 | 0.15  | 0.099 | 0.184 | 0.085 | 1.851 | 7.28   | 0.938 | 0.884 | 0.829 | 0.557 | 2.772 | 1.425 | 4.681 | 3.257 | 11.625 | 1.56  | 3.324 | 7.58    | 2.79  |
| 271056 | 0.174 | 2.734 | 1.267 | 2.347 | 1.733 | 3.477 | 1.744 | 0.095 | 0.058 | 0.123 | 0.065 | 3.63  | 22.764 | 0.902 | 0.902 | 0.813 | 0.438 | 2.142 | 0.611 | 4.274 | 3.664 | 7.815  | 2.782 | 1.832 | -5.447  | 1.974 |
| 271058 | 0.202 | 3.206 | 1.342 | 3.209 | 2.108 | 4.147 | 2.039 | 0.116 | 0.076 | 0.158 | 0.081 | 2.649 | 12.044 | 0.924 | 0.892 | 0.824 | 0.518 | 3.085 | 1.425 | 4.274 | 2.85  | 11.524 | 3.189 | 3.189 | 0       | 3.335 |

|           |       |       |       |       |       |       |       |       |       |       |       |       |        |       |       |       |       |       |       |       |       |        |       |       |         |       |
|-----------|-------|-------|-------|-------|-------|-------|-------|-------|-------|-------|-------|-------|--------|-------|-------|-------|-------|-------|-------|-------|-------|--------|-------|-------|---------|-------|
| 271059    | 0.197 | 2.928 | 1.131 | 2.609 | 2.062 | 3.862 | 1.8   | 0.13  | 0.1   | 0.163 | 0.063 | 2.512 | 10.926 | 0.903 | 0.89  | 0.804 | 0.4   | 2.192 | 1.425 | 3.596 | 2.171 | 6.25   | 1.425 | 2.782 | 6.875   | 2.11  |
| 292878    | 0.296 | 2.306 | 1.314 | 1.816 | 1.334 | 3.298 | 1.964 | 0.146 | 0.073 | 0.205 | 0.132 | 3.884 | 27.591 | 0.902 | 0.877 | 0.791 | 0.404 | 1.525 | 0.746 | 4.546 | 3.799 | 7.571  | 1.832 | 3.732 | 6.41    | 1.565 |
| 361416    | 0.165 | 3.202 | 1.317 | 3.164 | 2.218 | 3.953 | 1.736 | 0.079 | 0.044 | 0.111 | 0.067 | 1.519 | 5.622  | 0.946 | 0.907 | 0.859 | 0.621 | 2.825 | 1.425 | 3.732 | 2.307 | 10.118 | 3.732 | 3.46  | -1.646  | 3.062 |
| 373507    | 0.259 | 3.254 | 1.512 | 3.017 | 1.92  | 4.132 | 2.212 | 0.124 | 0.08  | 0.177 | 0.096 | 2.59  | 12.548 | 0.948 | 0.88  | 0.834 | 0.658 | 2.615 | 1.153 | 5.36  | 4.206 | 8.355  | 3.189 | 1.696 | -5.759  | 3.062 |
| 449261    | 0.235 | 2.762 | 1.155 | 2.66  | 1.791 | 3.46  | 1.67  | 0.136 | 0.092 | 0.177 | 0.085 | 3.417 | 19.641 | 0.909 | 0.884 | 0.803 | 0.424 | 2.342 | 1.289 | 3.46  | 2.171 | 8.25   | 2.646 | 1.56  | -4.621  | 1.837 |
| 454408    | 0.303 | 2.98  | 1.568 | 2.766 | 1.649 | 4.06  | 2.411 | 0.141 | 0.096 | 0.187 | 0.091 | 3.705 | 22.672 | 0.932 | 0.875 | 0.816 | 0.587 | 2.219 | 0.611 | 6.988 | 6.378 | 11.83  | 0.746 | 6.174 | 17.92   | 1.837 |
| 479427    | 0.252 | 2.844 | 1.254 | 2.663 | 1.732 | 3.716 | 1.984 | 0.135 | 0.08  | 0.185 | 0.105 | 5.06  | 47.761 | 0.925 | 0.882 | 0.816 | 0.494 | 2.633 | 1.289 | 4.41  | 3.121 | 9.174  | 3.324 | 3.189 | -0.539  | 2.654 |
| 515000    | 0.153 | 2.505 | 1.14  | 2.151 | 1.62  | 3.141 | 1.52  | 0.078 | 0.042 | 0.117 | 0.075 | 2.622 | 12.129 | 0.895 | 0.911 | 0.815 | 0.367 | 2.145 | 1.289 | 4.139 | 2.85  | 8.19   | 2.51  | 1.696 | -5.331  | 1.974 |
| 515001    | 0.193 | 2.355 | 1.284 | 1.81  | 1.443 | 3.059 | 1.616 | 0.101 | 0.055 | 0.147 | 0.092 | 2.573 | 10.621 | 0.894 | 0.895 | 0.8   | 0.391 | 1.929 | 0.611 | 4.139 | 3.528 | 7.308  | 0.611 | 0.611 | 0       | 1.837 |
| 517840    | 0.254 | 3.218 | 1.45  | 3.048 | 1.986 | 4.302 | 2.316 | 0.133 | 0.085 | 0.179 | 0.094 | 1.658 | 6.436  | 0.948 | 0.881 | 0.835 | 0.615 | 2.912 | 1.153 | 6.038 | 4.885 | 10.722 | 3.189 | 4.274 | 4.266   | 1.837 |
| 519176    | 0.227 | 2.715 | 1.206 | 2.759 | 1.793 | 3.439 | 1.646 | 0.108 | 0.064 | 0.151 | 0.087 | 2.068 | 8.152  | 0.922 | 0.886 | 0.817 | 0.474 | 2.565 | 1.289 | 4.274 | 2.985 | 13.955 | 3.596 | 2.103 | -6.585  | 1.974 |
| 520734    | 0.219 | 2.439 | 1.178 | 2.064 | 1.602 | 3.29  | 1.688 | 0.12  | 0.078 | 0.166 | 0.087 | 2.214 | 8.753  | 0.91  | 0.888 | 0.808 | 0.425 | 2.199 | 0.611 | 4.274 | 3.664 | 11.407 | 3.46  | 3.189 | -1.241  | 1.974 |
| 520735    | 0.215 | 3.12  | 1.403 | 2.992 | 1.983 | 3.829 | 1.846 | 0.106 | 0.069 | 0.146 | 0.076 | 1.596 | 6      | 0.947 | 0.888 | 0.84  | 0.617 | 2.49  | 1.289 | 3.867 | 2.578 | 7.947  | 2.782 | 1.289 | -6.938  | 3.062 |
| 520740    | 0.234 | 2.735 | 1.385 | 2.533 | 1.557 | 3.701 | 2.144 | 0.115 | 0.071 | 0.165 | 0.094 | 2.606 | 11.768 | 0.928 | 0.885 | 0.821 | 0.55  | 2.271 | 0.611 | 4.546 | 3.935 | 10.103 | 0.611 | 3.189 | 11.027  | 1.565 |
| 520743    | 0.19  | 2.882 | 1.366 | 2.909 | 1.765 | 3.705 | 1.94  | 0.095 | 0.056 | 0.139 | 0.083 | 2.739 | 11.659 | 0.919 | 0.897 | 0.824 | 0.524 | 2.357 | 0.611 | 3.867 | 3.257 | 11.875 | 0.611 | 1.832 | 6.433   | 1.837 |
| 520744    | 0.267 | 2.7   | 1.193 | 2.672 | 1.766 | 3.585 | 1.82  | 0.132 | 0.085 | 0.192 | 0.107 | 2.183 | 10.288 | 0.921 | 0.879 | 0.809 | 0.42  | 2.29  | 1.018 | 3.867 | 2.85  | 15.381 | 1.968 | 2.103 | 0.508   | 1.837 |
| 522866    | 0.185 | 2.669 | 1.262 | 2.359 | 1.682 | 3.465 | 1.784 | 0.101 | 0.072 | 0.136 | 0.065 | 2.467 | 11.542 | 0.917 | 0.897 | 0.823 | 0.477 | 2.281 | 1.289 | 3.867 | 2.578 | 15.737 | 1.425 | 1.289 | -0.735  | 1.974 |
| 525055    | 0.24  | 2.682 | 1.335 | 2.317 | 1.646 | 3.596 | 1.95  | 0.123 | 0.08  | 0.176 | 0.096 | 3.152 | 16.206 | 0.913 | 0.883 | 0.807 | 0.491 | 2.059 | 1.289 | 4.139 | 2.85  | 14.762 | 3.867 | 3.053 | -3.391  | 1.837 |
| 525108    | 0.207 | 2.652 | 1.446 | 2.084 | 1.596 | 3.6   | 2.004 | 0.099 | 0.058 | 0.147 | 0.09  | 3.099 | 15.932 | 0.919 | 0.891 | 0.819 | 0.517 | 1.64  | 0.882 | 3.324 | 2.442 | 7.833  | 3.189 | 1.425 | -8.518  | 1.974 |
| 525109    | 0.185 | 2.441 | 1.252 | 1.995 | 1.567 | 3.046 | 1.479 | 0.09  | 0.048 | 0.134 | 0.085 | 3.382 | 18.254 | 0.902 | 0.899 | 0.811 | 0.448 | 1.974 | 0.882 | 3.732 | 2.85  | 8.143  | 2.239 | 1.832 | -2.205  | 1.837 |
| 527653    | 0.29  | 2.588 | 1.227 | 2.219 | 1.77  | 3.289 | 1.519 | 0.146 | 0.096 | 0.205 | 0.109 | 3.366 | 18.922 | 0.914 | 0.877 | 0.802 | 0.466 | 2.052 | 1.425 | 3.867 | 2.442 | 13.389 | 2.782 | 2.917 | 0.468   | 1.974 |
| 583036    | 0.304 | 2.608 | 1.505 | 2.071 | 1.463 | 3.382 | 1.919 | 0.138 | 0.088 | 0.19  | 0.102 | 2.533 | 11.609 | 0.932 | 0.875 | 0.815 | 0.544 | 1.944 | 0.517 | 6.868 | 6.351 | 10.093 | 0.517 | 3.471 | 9.705   | 2     |
| 83881001  | 0.146 | 2.692 | 1.172 | 2.383 | 1.792 | 3.331 | 1.539 | 0.075 | 0.048 | 0.103 | 0.055 | 2.371 | 9.869  | 0.906 | 0.896 | 0.813 | 0.436 | 2.444 | 1.625 | 3.397 | 1.772 | 21     | 3.397 | 2.215 | -8.113  | 1.926 |
| 85167141  | 0.277 | 2.569 | 1.141 | 2.327 | 1.721 | 3.14  | 1.419 | 0.154 | 0.096 | 0.208 | 0.112 | 3.027 | 16.003 | 0.905 | 0.878 | 0.794 | 0.403 | 2.054 | 1.255 | 3.766 | 2.511 | 14.353 | 3.471 | 1.403 | -7.465  | 1.852 |
| 85168301  | 0.287 | 2.861 | 1.316 | 2.678 | 1.748 | 3.518 | 1.771 | 0.168 | 0.113 | 0.218 | 0.105 | 2.695 | 11.881 | 0.928 | 0.877 | 0.813 | 0.521 | 2.306 | 0.517 | 3.618 | 3.102 | 14     | 0.517 | 2.585 | 7.206   | 2.741 |
| 101175591 | 0.216 | 3.3   | 1.518 | 3.35  | 1.869 | 4.377 | 2.507 | 0.11  | 0.064 | 0.154 | 0.09  | 3.121 | 18.689 | 0.938 | 0.889 | 0.834 | 0.608 | 3.078 | 0.611 | 6.445 | 5.835 | 11.14  | 0.611 | 1.56  | 4.393   | 3.879 |
| 126249041 | 0.236 | 2.921 | 1.421 | 2.787 | 1.745 | 3.82  | 2.075 | 0.133 | 0.076 | 0.179 | 0.103 | 3.081 | 17.749 | 0.928 | 0.885 | 0.821 | 0.556 | 2.317 | 1.153 | 4.41  | 3.257 | 10.375 | 1.832 | 3.867 | 8.617   | 1.837 |
| 133639181 | 0.179 | 2.893 | 1.144 | 2.551 | 2.149 | 3.691 | 1.543 | 0.098 | 0.063 | 0.135 | 0.072 | 2.914 | 13.714 | 0.901 | 0.9   | 0.811 | 0.345 | 2.468 | 1.696 | 3.189 | 1.493 | 5.182  | 2.917 | 1.968 | -5.305  | 2.11  |
| 146310731 | 0.194 | 3.253 | 1.422 | 3.218 | 2.019 | 4.045 | 2.025 | 0.109 | 0.078 | 0.141 | 0.063 | 2.524 | 12.429 | 0.932 | 0.892 | 0.831 | 0.559 | 2.845 | 1.698 | 4.652 | 2.954 | 14.7   | 4.062 | 1.994 | -10.676 | 2     |

|           |       |       |       |       |       |       |       |       |       |       |       |       |        |       |       |       |       |       |       |       |       |        |       |       |         |       |
|-----------|-------|-------|-------|-------|-------|-------|-------|-------|-------|-------|-------|-------|--------|-------|-------|-------|-------|-------|-------|-------|-------|--------|-------|-------|---------|-------|
| 169462401 | 0.227 | 3.181 | 1.326 | 3.015 | 2.115 | 3.863 | 1.747 | 0.096 | 0.062 | 0.151 | 0.089 | 3.354 | 19.757 | 0.931 | 0.885 | 0.824 | 0.563 | 2.853 | 0.611 | 4.274 | 3.664 | 7.444  | 4.274 | 0.611 | -16.154 | 3.062 |
| 169465401 | 0.245 | 3.101 | 1.357 | 2.926 | 1.915 | 3.83  | 1.914 | 0.119 | 0.073 | 0.162 | 0.089 | 3.705 | 24.468 | 0.93  | 0.883 | 0.82  | 0.564 | 2.517 | 0.611 | 4.274 | 3.664 | 11.185 | 4.139 | 0.611 | -14.424 | 1.974 |
| 169671031 | 0.156 | 3.156 | 1.384 | 2.984 | 2     | 3.943 | 1.944 | 0.067 | 0.042 | 0.093 | 0.051 | 2.704 | 14.282 | 0.935 | 0.908 | 0.848 | 0.577 | 2.313 | 0.611 | 6.174 | 5.563 | 7.146  | 2.103 | 0.611 | -9.597  | 3.062 |
| 169671031 | 0.169 | 3.185 | 1.364 | 3.099 | 2.033 | 4.064 | 2.031 | 0.086 | 0.056 | 0.111 | 0.056 | 2.067 | 8.451  | 0.939 | 0.903 | 0.848 | 0.593 | 2.324 | 0.611 | 4.003 | 3.392 | 7.68   | 2.239 | 0.611 | -9.632  | 1.974 |
| 170154121 | 0.164 | 2.946 | 1.383 | 2.862 | 1.794 | 3.912 | 2.118 | 0.094 | 0.061 | 0.119 | 0.059 | 2.133 | 9.813  | 0.936 | 0.905 | 0.847 | 0.557 | 2.502 | 1.153 | 4.546 | 3.392 | 7.84   | 1.832 | 3.46  | 9.934   | 1.837 |
| 170161761 | 0.191 | 3.22  | 1.314 | 3.109 | 2.341 | 3.857 | 1.516 | 0.113 | 0.083 | 0.138 | 0.055 | 2.364 | 9.479  | 0.932 | 0.893 | 0.832 | 0.575 | 3.024 | 0.611 | 4.139 | 3.528 | 8      | 3.867 | 0.611 | -17.017 | 3.062 |
| 190882841 | 0.194 | 2.744 | 1.216 | 2.496 | 1.903 | 3.59  | 1.687 | 0.091 | 0.051 | 0.133 | 0.082 | 2.12  | 9.662  | 0.924 | 0.893 | 0.826 | 0.493 | 2.247 | 0.517 | 4.209 | 3.692 | 12.16  | 0.517 | 1.698 | 6.094   | 2     |
| 212534271 | 0.156 | 3.465 | 1.49  | 3.359 | 2.192 | 4.295 | 2.103 | 0.084 | 0.054 | 0.114 | 0.061 | 1.751 | 6.34   | 0.951 | 0.911 | 0.866 | 0.665 | 3.232 | 1.425 | 4.546 | 3.121 | 12.261 | 3.867 | 3.053 | -5.216  | 4.015 |

The column headings abbreviations are as follows (from left to right): Record ID (sound file recording ID number), Dur (duration; sound file length in seconds), Avg Freq (average frequency; average frequency in kHz), SD (standard deviation; standard deviation of frequency in kHz), Freq Med (median frequency; the frequency at which the signal is divided in two frequency intervals of equal energy in kHz), Freq Q25 (first quartile frequency; the frequency at which the signal is divided in two frequency intervals of 25% and 75% energy respectively (in kHz), Freq Q75 (third quartile frequency; the frequency at which the signal is divided in two frequency intervals of 75% and 25% energy respectively in kHz), Freq IQR (interquartile frequency range; frequency range between 'freq.Q25' and 'freq.Q75' in kHz); Tim Med (median time; the time at which the signal is divided in two time intervals of equal energy in s), Tim Q25 (first quartile time; the time at which the signal is divided in two time intervals of 25% and 75% energy respectively in s), Tim Q75 (third quartile time; the time at which the signal is divided in two time intervals of 75% and 25% energy respectively in s), Tim IQR (interquartile time range; time range between 'time.Q25' and 'time.Q75' in s), Skew (skewness; asymmetry of the spectrum); Kurt (kurtosis; peakedness of the spectrum), Sp Entr (spectral entropy; energy distribution of the frequency spectrum, pure tone ~ 0; noisy ~ 1), Tim Entr (time entropy; energy distribution on the time envelope, pure tone ~ 0; noisy ~ 1), Entr (spectrographic entropy; product of time and spectral entropy), Sfm (spectral flatness; similar to sp.ent, pure tone ~ 0; noisy ~ 1), Avg Dom (average of dominant frequency measured across the acoustic signal), Min Dom (minimum of dominant frequency measured across the acoustic signal), Max Dom (maximum of dominant frequency measured across the acoustic signal), Df rang (range of dominant frequency measured across the acoustic signal), Mod Indx (modulation index. Calculated as the cumulative absolute difference between adjacent measurements of dominant frequencies divided by the dominant frequency range, 1 means the signal is not modulated), Start Dom (dominant frequency measurement at the start of the signal), End Dom (dominant frequency measurement at the end of the signal), Df Slope (slope of the change in dominant frequency through time, (enddom-startdom)/duration in kHz per sec), Mean Peak Freq (mean peak frequency. Frequency with highest energy from the mean frequency spectrum)
